# Supplementary material
Source: PubMed Central journal article supplement (PMC4893906)
Supplement: NIHMS777007-supplement-1.pdf [file NIHMS777007-supplement-1.pdf]

Supplementary table S1: Demographic characteristics, clinical scores and administered treatment of patients with SLE.

| # Sample | Ethnicity        | Sex | Age | SLEDAI | Treatment              |
|----------|------------------|-----|-----|--------|------------------------|
| L1       | Caucasian        | F   | 30  | 2      | P,HDQ, AZA             |
| L2       | Caucasian        | F   | 41  | 4      | HDQ                    |
| L3       | African-american | F   | 43  | 0      | HDQ, AZA               |
| L4       | Hispanic         | F   | 47  | 8      | P,HDQ, Abatacept       |
| L5       | African-american | F   | 28  | 3      | P,HDQ, AZA             |
| L6       | African-american | F   | 31  | 3      | HDQ, MMF               |
| L7       | Caucasian        | F   | 49  | 8      | P,HDQ, MMF             |
| L8       | Caucasian        | F   | 30  | 3      | HDQ, AZA               |
| L9       | Caucasian        | F   | 38  | 2      | P,HDQ                  |
| L10      | African-american | F   | 45  | 2      | P, MMF                 |
| L11      | Caucasian        | F   | 44  | 2      | HDQ                    |
| L12      | Caucasian        | F   | 25  | 3      | P,HDQ, MMF             |
| L13      | African-american | F   | 41  | 10     | MMF                    |
| L14      | Caucasian        | F   | 30  | 4      | P, HDQ, AZA, Belimumab |
| L15      | Caucasian        | F   | 56  | 4      | HDQ, AZA               |
| L16      | African-american | M   | 31  | 4      | P,HDQ, AZA             |
| L17      | Caucasian        | F   | 28  | 3      | HDQ, MMF               |
| L18      | Caucasian        | F   | 28  | 4      | P,HDQ, MMF             |
| L19      | Caucasian        | F   | 30  | 3      | P,HDQ, AZA             |
| L20      | African-american | F   | 32  | 3      | HDQ                    |
| L21      | Caucasian        | F   | 47  | 4      | HDQ, MMF               |
| L22      | Caucasian        | F   | 26  | 2      | HDQ, AZA               |
| L23      | Caucasian        | F   | 71  | 2      | P,HDQ                  |
| L24      | Caucasian        | F   | 47  | 0      | AZA,                   |
| L25      | Asian            | F   | 25  | 2      | HDQ, MMF               |
| L26      | African-american | F   | 43  | 0      | HDQ, MTX               |
| L27      | African-american | F   | 36  | 16     | HDQ, CyC (IV)          |
| L28      | Caucasian        | F   | 36  | 4      | MMF                    |
| L29      | African-american | M   | 31  | 6      | P,HDQ, AZA             |
| L30      | Asian            | M   | 31  | 7      | HDQ, MMF               |
| L31      | Caucasian        | F   | 21  | 3      | HDQ, AZA               |
| L32      | African-american | F   | 31  | 3      | HDQ, MMF               |
| L33      | Caucasian        | F   | 49  | 12     | P,HDQ                  |
| L34      | Caucasian        | F   | 47  | 2      | HDQ, MMF               |
| L35      | Caucasian        | F   | 36  | 8      | No treatment           |

P=prednizone, HDQ=hydroxychloroquine, MMF= mycophenolate mofetil, AZA=azathioprine, MTX=methotrexate, CyC= cyclophosphamide,
